# Supplementary material for: Effects of COVID-19 on Autoimmune Disease Incidence and DMARD Utilization: Evidence from Japanese Insurance Claims Data
Source: Research Square preprint supplement (doi:10.21203/rs.3.rs-7104550/v1), 2025-07-18
Supplement: Supplementary file 1 [file c1e3e5933813f1e2a711a8ea.docx]

Supplemental Figure 1: Illustration of this study design

The attached figure illustrates the timeline and design of a matched cohort study assessing the impact of COVID-19 infection on specific outcomes. The timeline is divided into two key segments: **calendar time** (2015–2022) and the **matched cohort design** phases. **Enrollment and Baseline Assessment**: Participants are enrolled starting from 2015, and their baseline characteristics, including the Charlson Comorbidity Index (CCI) and prescription history, are assessed during the **look-back period** (one year before the index month). **Start of the Inclusion Period**: The inclusion period begins on **January 1, 2020**, marking the start of the analysis for individuals eligible for follow-up based on the cohort criteria. **COVID-19 Infection**: The **index month** represents the time of COVID-19 infection for cases, serving as the anchor point for subsequent follow-up and comparison with matched controls. **Follow-Up Period**: Following the index month, individuals are observed longitudinally until the **end of the observation period on December 31, 2022**. The timeline highlights the integration of pre-infection data collection, cohort inclusion, and follow-up, providing a robust framework for analyzing the long-term effects of COVID-19 infection compared to a matched non-infected control group.


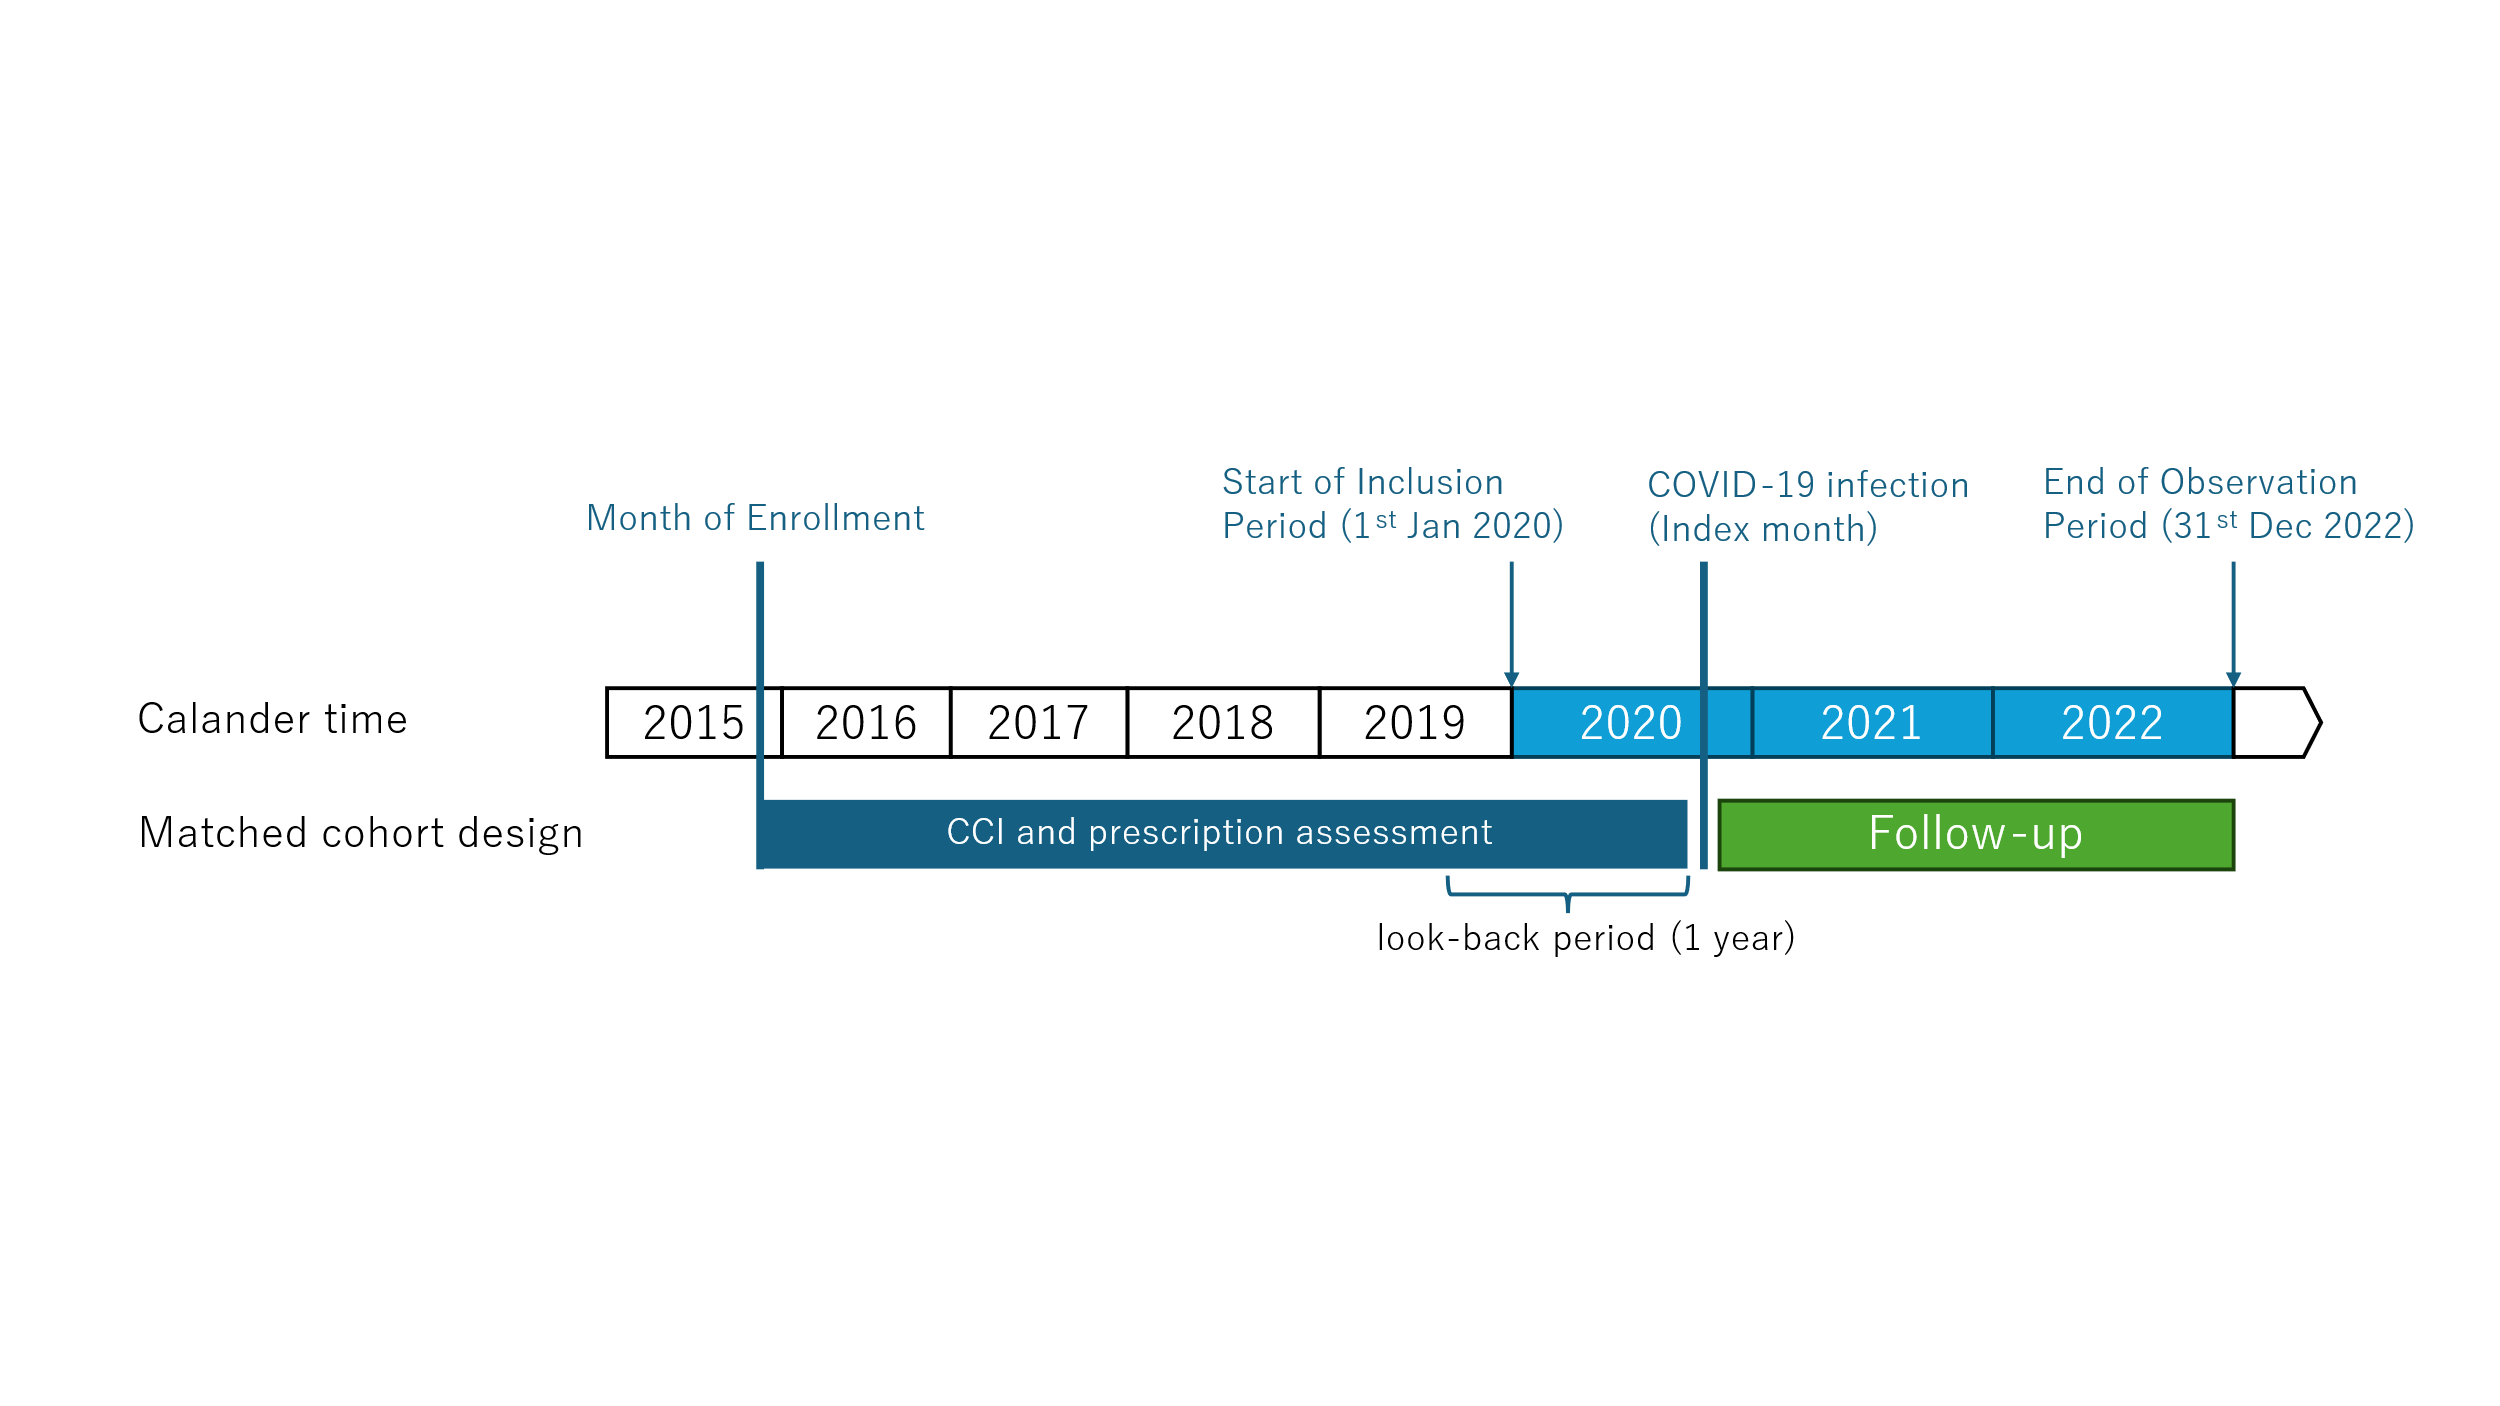


Supplemental Table1: Classification of Disease-Modifying Antirheumatic Drugs (DMARDs) and Corresponding ATC Codes

| **Category** | **Drugs** | **ATC Codes** |
| --- | --- | --- |
| bDMARD | Abatacept, Orencia, Etanercept, Enbrel, Infliximab, Remicade, Adalimumab, Humira, Certolizumab, Cimzia, Golimumab, Simponi, Sarilumab, Kevzara, Denosumab, Prolia, Xgeva | L04AA24, L04AB01, L04AB02, L04AB04, L04AB05, L04AB06, L04AC14, M05BX04 |
| COVID DMARDs | Baricitinib, Olumiant, Tocilizumab, Actemra | L04AA37, L04AC07 |
| csDMARD | Gold thiomalate, Thiomalate, Penicillamine, Metal captase, Bucillamine, Lobenzarit disodium, Iguratimod, Carelam, Sulfasalazine, Sulfasalazine (Salazopyrin), Actarit, Mova, Oakle, Leflunomide, Arava, Tacrolimus, Graceptor, Prograf, Azathioprine, Azanin, Imuran, Methotrexate, Metoject, Rheumatrex, Mizoribine, Bredinin | M01CB01, M01CB01, M01CC01, N/A, M01CC01, M01AX08, M01AX17, M01AX17, A07EC01, M01AX04, L04AA13, L04AA13, L04AD02, L04AX01, L01BA01, L04AX02 |
| tsDMARD | Tofacitinib, Xeljanz, Upadacitinib, Rinvoq, Filgotinib, Jyseleca, Peficitinib, Smyraf | L04AA29, L04AA29, L04AA44, L04AA45 |

**bDMARD**: Biologic Disease-Modifying Antirheumatic Drugs, used to treat autoimmune diseases by targeting specific components of the immune system. **csDMARD**: Conventional Synthetic Disease-Modifying Antirheumatic Drugs, traditional small-molecule drugs that reduce inflammation and prevent joint damage. **tsDMARD**: Targeted Synthetic Disease-Modifying Anti rheumatic Drugs, a newer class of small-molecule drugs that inhibit specific intracellular signaling pathways. **COVID DMARDs**: Disease-Modifying Antirheumatic Drugs repurposed or developed for the treatment of severe inflammatory responses in COVID-19. **ATC Code**: Anatomical Therapeutic Chemical Classification System code, categorizing drugs based on their therapeutic use and mechanism of action for international standardization.

| Category | Description | ICD-10 Codes |
| --- | --- | --- |
| Glomerulonephritis | Acute glomerulonephritis, rapidly progressive nephritis, and other chronic nephritic syndromes | N000, N001, N002, N003, N004, N005, N006, N007, N008, N009, N011, N012, N013, N014, N015, N016, N017, N018, N019, N030, N032, N033, N034, N035, N036, N037, N038, N039, N040, N041, N042, N043, N044, N045, N046, N047, N048, N049, N05, N050, N051, N052, N053, N054, N055, N056, N057, N058, N059 |
| Systemic Connective Tissue Disorders | Systemic vasculitis, lupus erythematosus, systemic sclerosis, and other connective tissue disorders | M300, M301, M302, M303, M308, M310, M311, M313, M314, M315, M316, M317, M318, M319, M320, M321, M328, M329, M330, M331, M332, M339, M340, M341, M342, M348, M349, M350, M351, M352, M353, M354, M355, M356, M357, M358, M359, M36 |
| Arthritis | Rheumatoid arthritis, juvenile arthritis, and other inflammatory arthropathies | M050, M051, M052, M053, M058, M059, M060, M061, M062, M063, M064, M068, M069, M070, M071, M072, M073, M074, M075, M076, M081, M082, M083, M084, M088, M089 |
| Bullous Disorders | Pemphigus, pemphigoid, and other bullous skin disorders | L100, L101, L102, L103, L104, L105, L108, L109, L120, L121, L122, L123, L128, L129, L130, L138, L139, L14, |
| Psoriasis | Psoriasis and related conditions | L400, L401, L402, L403, L404, L405, L408, L409 |
| Inflammatory Bowel Disease | Crohn's disease and ulcerative colitis | K500, K501, K508, K509, K510, K512, K513, K514, K515, K518, K519 |
| Respiratory Disorders | Acute respiratory distress syndrome and interstitial pulmonary diseases | J80, J841, J848, J849 |
| Central Nervous System Disorders | Demyelinating diseases, multiple sclerosis, and other CNS disorders | G048, G049, G35, G70, G700, G701, G702, G708, G709 |
| Immunodeficiency Disorders | Aplastic anemia, sarcoidosis, and cryoglobulinemia | D610, D611, D612, D613, D618, D619, D860, D861, D862, D863, D868, D869, D890, D891 |

Supplemental Table2: Definition of Secondary Outcome

ICD-10: International Classification of Diseases, 10th Revision.

Supplementary Table 3: Sensitivity analysis for participants without rheumatic diseases history.

| **Subgroup Category** | **Subgroup Level** | **No. of Individuals** | **No. of Events (COVID-19)** | **No. of Events (Control)** | **Incidence Rate (95% CI) COVID-19** | **Incidence Rate (95% CI) Control** | **Incidence Rate Ratio** |  | |
| --- | --- | --- | --- | --- | --- | --- | --- | --- | --- |
| Overall | Overall | 5824904 | 5721 | 4083 | 209.56 (204.20–215.06) | 149.09 (144.59–153.74) | 1.41 (1.35–1.46) | |
| Primary | bDMARD | 5824904 | 477 | 289 | 17.47 (15.97–19.11) | 10.55 (9.40–11.84) | 1.66 (1.43–1.92) | |
|  | COVID DMARD | 5824904 | 304 | 249 | 11.14 (9.95–12.46) | 9.09 (8.03–10.29) | 1.22 (1.03–1.45) | |
|  | csDMARD | 5824904 | 4984 | 3483 | 182.72 (177.72–187.86) | 127.29 (123.13–131.59) | 1.44 (1.37–1.50) | |
|  | tsDMARD | 5824904 | 311 | 258 | 11.39 (10.19–12.73) | 9.42 (8.34–10.64) | 1.21 (1.02–1.43) | |
| Sex | Male | 2612210 | 2671 | 1757 | 218.43 (210.30–226.88) | 142.79 (136.27–149.63) | 1.53 (1.44–1.63) | |
|  | Female | 3212694 | 3050 | 2326 | 202.36 (195.30–209.67) | 154.23 (148.09–160.63) | 1.31 (1.24–1.39) | |
| Age | 0-19 | 1213949 | 350 | 236 | 74.96 (67.50–83.24) | 51.52 (45.35–58.54) | 1.45 (1.23–1.72) | |
|  | 20-64 | 2723325 | 3110 | 2341 | 238.27 (230.05–246.80) | 181.21 (174.01–188.70) | 1.31 (1.25–1.39) | |
|  | 65 or over | 1887630 | 2261 | 1506 | 236.04 (226.51–245.97) | 152.33 (144.83–160.22) | 1.55 (1.45–1.65) | |
| CCI | 0-1 | 3060961 | 2077 | 1636 | 156.94 (150.34–163.84) | 124.76 (118.86–130.95) | 1.26 (1.18–1.34) | |
|  | 2 or over | 2763943 | 3644 | 2447 | 259.06 (250.78–267.61) | 171.45 (164.79–178.38) | 1.51 (1.44–1.59) | |
| AMI | Absent | 5692512 | 5588 | 3991 | 210.11 (204.67–215.69) | 149.64 (145.07–154.35) | 1.40 (1.35–1.46) | |
|  | Present | 132392 | 133 | 92 | 188.87 (159.35–223.86) | 128.77 (104.97–157.97) | 1.47 (1.12–1.93) | |
| CHF | Absent | 4869426 | 4507 | 3260 | 201.01 (195.22–206.96) | 146.00 (141.07–151.10) | 1.38 (1.32–1.44) | |
|  | Present | 955478 | 1214 | 823 | 248.85 (235.24–263.25) | 162.75 (152.00–174.26) | 1.53 (1.40–1.67) | |
| PVD | Absent | 5076597 | 4788 | 3440 | 204.27 (198.56–210.13) | 146.73 (141.91–151.72) | 1.39 (1.33–1.45) | |
|  | Present | 748307 | 933 | 643 | 241.69 (226.66–257.70) | 163.15 (151.01–176.26) | 1.48 (1.34–1.64) | |
| CEVD | Absent | 4919348 | 4743 | 3415 | 209.04 (203.17–215.07) | 150.96 (145.98–156.11) | 1.38 (1.32–1.45) | |
|  | Present | 905556 | 978 | 668 | 212.12 (199.23–225.84) | 140.21 (129.97–151.25) | 1.51 (1.37–1.67) | |
| Dementia | Absent | 5525072 | 5583 | 3966 | 215.41 (209.83–221.14) | 153.32 (148.62–158.16) | 1.41 (1.35–1.46) | |
|  | Present | 299832 | 138 | 117 | 99.83 (84.49–117.96) | 77.10 (64.32–92.42) | 1.29 (1.00–1.67) | |
| CPD | Absent | 2431095 | 2490 | 1811 | 219.72 (211.26–228.53) | 158.81 (151.67–166.30) | 1.38 (1.30–1.47) | |
|  | Present | 3393809 | 3231 | 2272 | 202.34 (195.48–209.44) | 142.16 (136.43–148.12) | 1.42 (1.35–1.50) | |
| PUD | Absent | 4239306 | 3475 | 2514 | 181.08 (175.16–187.21) | 131.26 (126.23–136.49) | 1.38 (1.31–1.45) | |
|  | Present | 1585598 | 2246 | 1569 | 276.93 (265.71–288.62) | 190.58 (181.38–200.25) | 1.45 (1.36–1.55) | |
| DM | Absent | 5355692 | 5045 | 3680 | 203.24 (197.71–208.92) | 148.02 (143.32–152.89) | 1.37 (1.32–1.43) | |
|  | Present | 469212 | 676 | 403 | 272.90 (253.08–294.26) | 159.61 (144.76–175.98) | 1.71 (1.51–1.94) | |
| LD | Absent | 4323320 | 3841 | 2764 | 194.49 (188.44–200.74) | 139.97 (134.85–145.29) | 1.39 (1.32–1.46) | |
|  | Present | 1501584 | 1880 | 1319 | 248.96 (237.96–260.47) | 172.66 (163.59–182.24) | 1.44 (1.34–1.55) | |
| HP/PAPL | Absent | 5737825 | 5644 | 4046 | 210.21 (204.79–215.76) | 150.24 (145.68–154.94) | 1.40 (1.34–1.46) | |
|  | Present | 87079 | 77 | 37 | 170.95 (136.73–213.73) | 81.15 (58.79–112.00) | 2.11 (1.41–3.21) | |
| RD | Absent | 5529871 | 5026 | 3721 | 195.02 (189.70–200.49) | 144.22 (139.66–148.93) | 1.35 (1.30–1.41) | |
|  | Present | 295033 | 695 | 362 | 454.68 (422.10–489.77) | 228.34 (205.99–253.12) | 1.99 (1.75–2.27) | |
| Cancer | Absent | 5084916 | 4669 | 3409 | 200.53 (194.86–206.36) | 146.67 (141.83–151.68) | 1.37 (1.31–1.43) | |
|  | Present | 739988 | 1052 | 674 | 261.91 (246.55–278.22) | 162.67 (150.84–175.42) | 1.61 (1.46–1.78) | |

No, number: CI, confidence interval: bDMARD, Biologic Disease-Modifying Antirheumatic Drugs; csDMARD, Conventional Synthetic Disease-Modifying Antirheumatic Drugs; tsDMARD, Targeted Synthetic Disease-Modifying Anti rheumatic Drugs; COVID DMARDs, Disease-Modifying Antirheumatic Drugs repurposed or developed for the treatment of severe inflammatory responses in COVID-19. CCI, Charlson Comorbidity Index; IRR, Incidence Rate Ratio; CI, Confidence Interval; PI, P-value for Interaction; AMI, Acute Myocardial Infarction; CHF, Congestive Heart Failure; PVD, Peripheral Vascular Disease; CEVD, Cerebrovascular Disease; CPD, Chronic Pulmonary Disease; PUD, Peptic Ulcer Disease; DM, Diabetes Mellitus; LD, Liver Disease; HP/PAPL, Hemiplegia or Paraplegia; RD, Renal Disease.
